# Supplementary material for: Copy Number Variation in the Horse Genome
Source: PubMed Central journal article supplement (PMC4207638; doi:10.1371/journal.pgen.1004712), 2014-10-23
Supplement: pgen.1004712.s003.pdf [file pgen.1004712.s003.pdf]

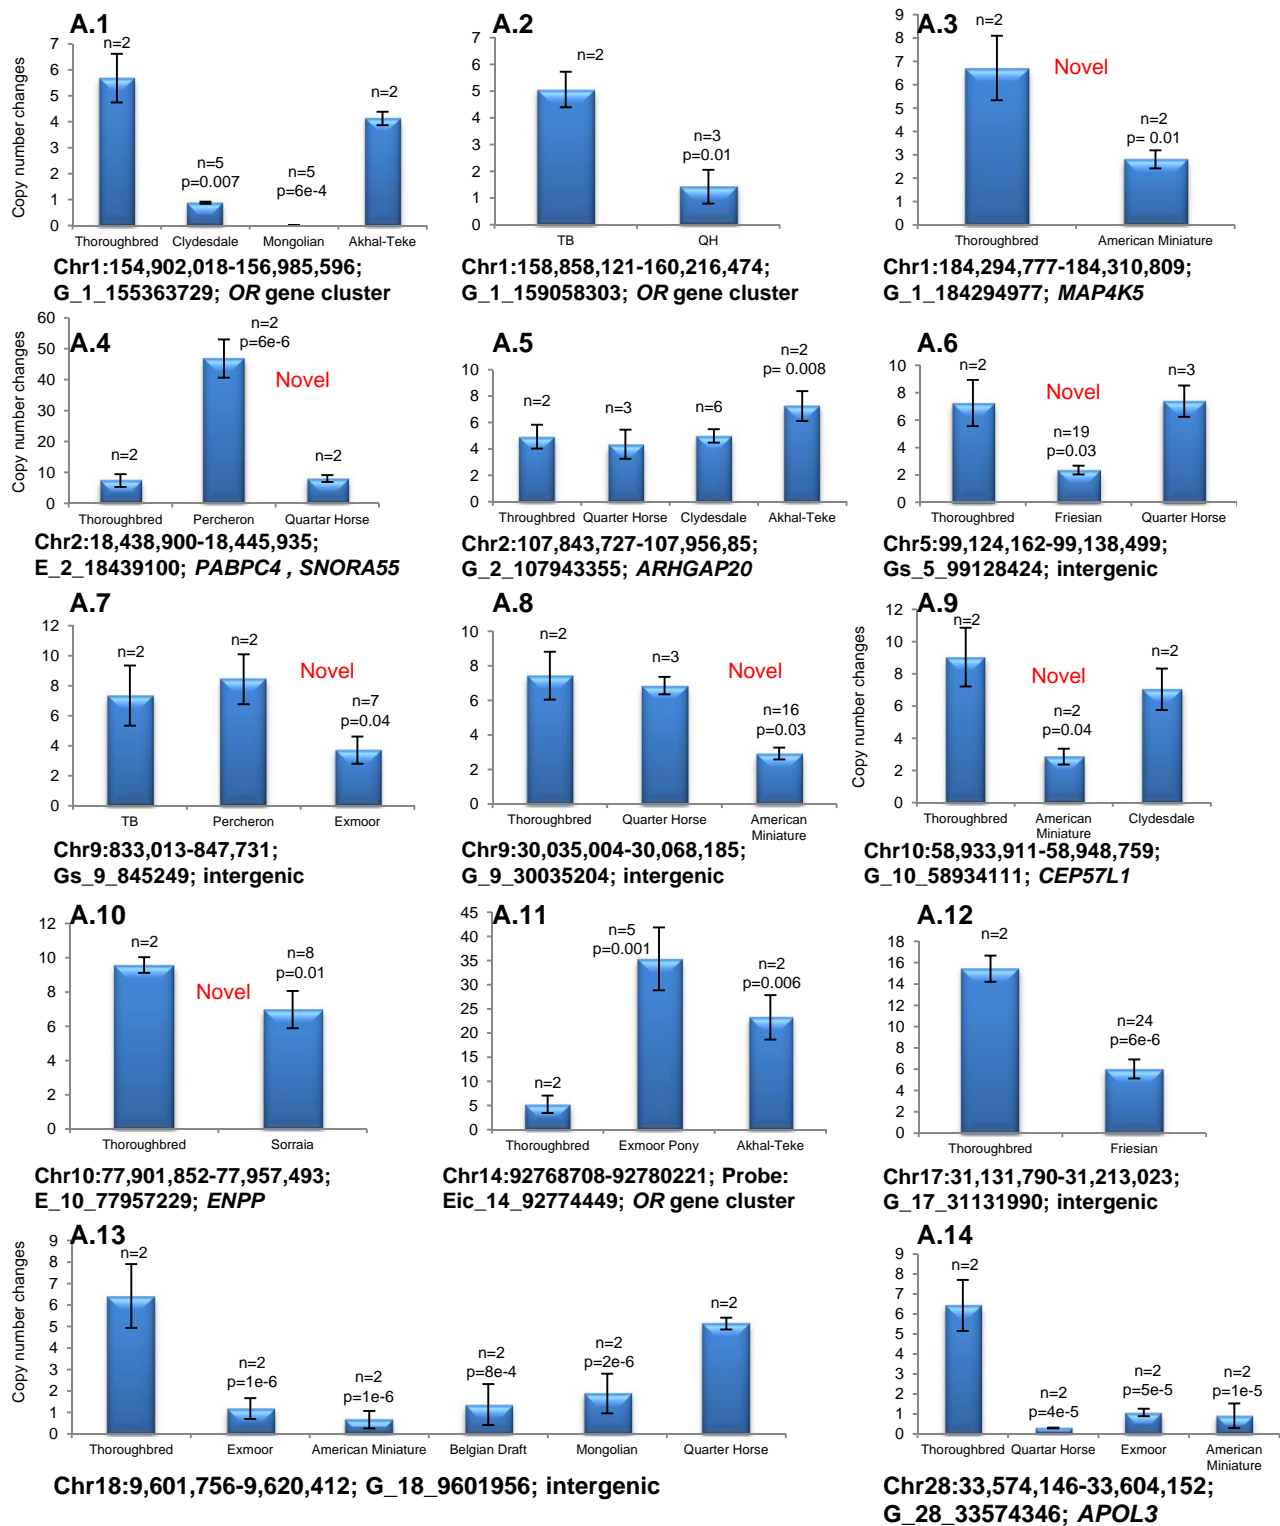

**Figure S3. Validation of selected CNVRs by quantitative PCR (qPCR): A1-A14**  
 qPCR was in agreement with aCGH in discovery horses and their breed-mates.

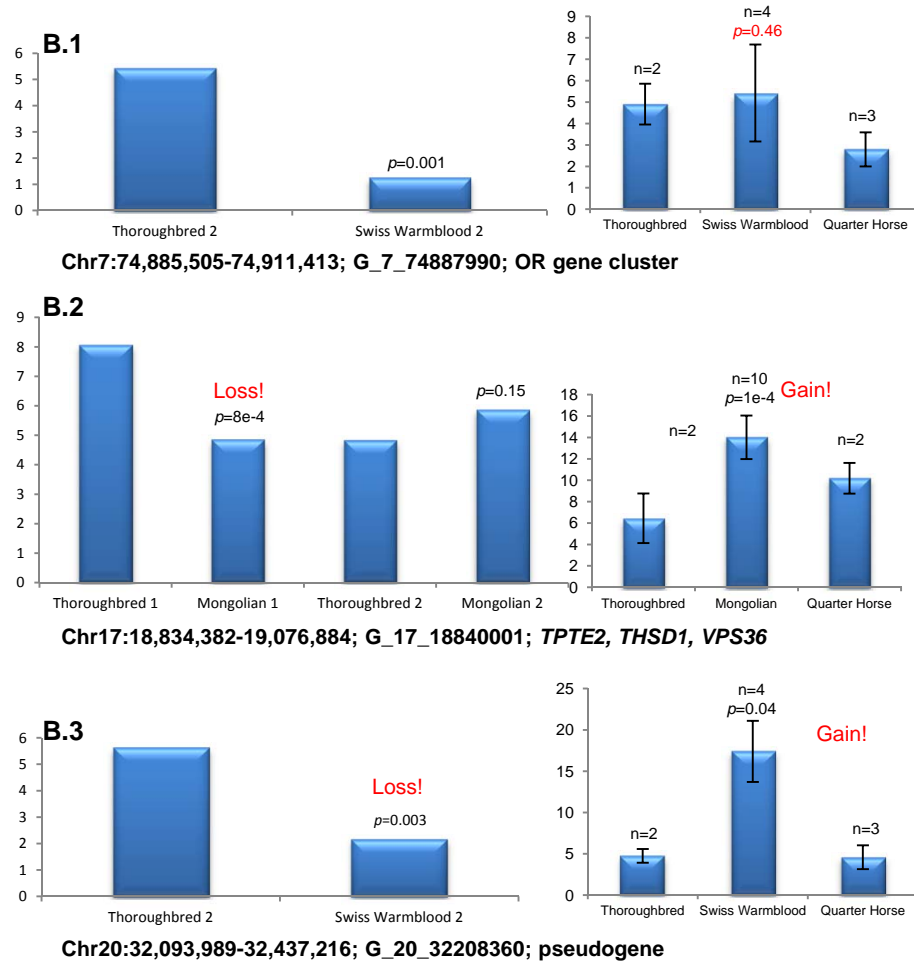

**Figure S3. Validation of selected CNVRs by quantitative PCR (qPCR): B1-B3** qPCR agrees with aCGH in the discovery horse (left) but not in additional horses of the same breed (right).
